# Supplementary material for: Genomic Insights on the Carbon-Negative Workhorse: Systematical Comparative Genomic Analysis on 56 Synechococcus Strains
Source: MDPI journal article supplement (doi:10.3390/bioengineering10111329), 2023-11-18
Supplement: s1 [file s1]

Supplementary

# Genomic Insights on the Carbon-Negative Workhorse: Systematical Comparative Genomic Analysis on 56 *Synechococcus* Strains

Meiwen Qian, Xiao Han, Jiongqin Liu, Ping Xu and Fei Tao \*

School of Life Sciences and Biotechnology, Shanghai Jiao Tong University, Shanghai 200240, China; 119080930114@sjtu.edu.cn (M.Q.); smile56@sjtu.edu.cn (X.H.); 697\_jiongqinliu@sjtu.edu.cn (J.L.); pingxu@sjtu.edu.cn (P.X.)

\* Correspondence: taofei@sjtu.edu.cn; Tel.: +86-21-34206647

**Table S1.** Dominant ecological conditions for *Synechococcus* clades.

| Ecosystem | Clade | subcluster | Ecological conditions with maximum relative abundance                                                | strain                                                                                |
|-----------|-------|------------|------------------------------------------------------------------------------------------------------|---------------------------------------------------------------------------------------|
| Marine    | 5.1   | I          | Nutrient open ocean waters in coastal or temperate zones are mainly above 30° north latitude         | CC9311, MVIR-18-1, PROS-9-1, ROS8604                                                  |
|           |       | II         | Offshore, low-nutrient tropical or subtropical waters between 20°N and 30°N                          | A15-62, CC9605, KORDI-52, M16.1, PROS-U-1, WH8109, A15-44, RS9902, TAK9802, KORDI-100 |
|           |       | IV         | Nutrient open waters in coastal or temperate zones                                                   | CC9902                                                                                |
|           |       | V          | Subtropical areas between 30° and 40° north latitude                                                 | WH7803, BMK-MC-1                                                                      |
|           |       | VI         | upwelling zone                                                                                       | MEDNS5, PROS-7-1                                                                      |
|           |       | VII        | Open oceans in the Northern Hemisphere, spanning latitudes covering tropical and subtropical regions | A15-60, A18-25c, NOUM97013                                                            |
|           |       | VIII       | Temperate regions with extensive salt tolerance                                                      | RS9909, WH8101                                                                        |
|           |       | CRD1       | Iron poverty, subequatorial Pacific                                                                  | BIOS-U3-1, MIT S9220                                                                  |
|           |       | UC-A       | Tropical waters of the western North Pacific                                                         | KORDI-100                                                                             |
|           |       | WPC1       | Large oligotrophic water body, open water                                                            | A15-127, KORDI-49                                                                     |
|           | 5.2   |            | Low nutrient Antarctic, subtropical coastal                                                          | CB0101, CBW1002, CBW1004, CBW1006, CBW1107, CBW1108, LTW-R, SynAce01, RSCCF101        |
|           | 5.3   |            | Mediterranean                                                                                        | MINOS11, RCC307                                                                       |
|           | C (3) |            | Lack of phycoerythrin, euryhaline, requires vitamin B12 for growth                                   | NIES-970, PCC 11901, PCC 7002, PCC 7003, PCC 7117, PCC 73109, PCC 8807                |

|                 |                                                                                 |                                                              |
|-----------------|---------------------------------------------------------------------------------|--------------------------------------------------------------|
| Freshwater      | Inland water bodies in North America, including freshwater lakes and reservoirs | PCC 6301, PCC 6312, PCC 7502, PCC 7942, UTEX 2973, UTEX 3055 |
| Thermal springs | High temperature, near the bottom of hot springs                                | JA-2-3B'a(2-13), JA-3-3Ab                                    |

**Table S2.** Status of pan-genome comparative analysis.

| Strain          | Core genes | Accessory genes | Unique genes | Exclusively absent genes |
|-----------------|------------|-----------------|--------------|--------------------------|
| A15-44          | 275        | 2292            | 112          | 0                        |
| A15-60          | 275        | 2230            | 87           | 0                        |
| A15-62          | 275        | 2092            | 80           | 0                        |
| A15-127         | 275        | 2154            | 147          | 1                        |
| A18-25c         | 275        | 2225            | 52           | 0                        |
| BIOS-U3-1       | 275        | 2181            | 280          | 0                        |
| BMK-MC-1        | 275        | 2325            | 109          | 0                        |
| CB0101          | 275        | 2032            | 474          | 1                        |
| CBW1002         | 275        | 2675            | 153          | 0                        |
| CBW1004         | 275        | 2115            | 704          | 4                        |
| CBW1006         | 275        | 2725            | 219          | 0                        |
| CBW1107         | 275        | 2173            | 506          | 0                        |
| CBW1108         | 275        | 2095            | 593          | 2                        |
| CC9311          | 275        | 2112            | 225          | 0                        |
| CC9605          | 275        | 2078            | 197          | 0                        |
| CC9902          | 275        | 1832            | 232          | 0                        |
| JA-2-3B'a(2-13) | 275        | 2091            | 223          | 2                        |
| JA-3-3Ab        | 275        | 2068            | 145          | 3                        |
| KORDI-49        | 275        | 2160            | 125          | 1                        |
| KORDI-52        | 275        | 2130            | 201          | 0                        |
| KORDI-100       | 275        | 2022            | 506          | 0                        |
| LTW-R           | 275        | 1814            | 400          | 0                        |
| M16.1           | 275        | 1945            | 42           | 0                        |
| MEDNS5          | 275        | 2106            | 122          | 0                        |
| MINOS11         | 275        | 2007            | 188          | 0                        |
| MIT S9220       | 275        | 2099            | 164          | 0                        |
| MVIR-18-1       | 275        | 2087            | 123          | 0                        |
| NIES-970        | 275        | 2326            | 206          | 0                        |
| NOUM97013       | 275        | 2202            | 134          | 0                        |
| PCC 6301        | 275        | 2296            | 3            | 5                        |
| PCC 6312        | 275        | 1245            | 1896         | 3                        |
| PCC 7002        | 275        | 2717            | 102          | 0                        |
| PCC 7003        | 275        | 2566            | 188          | 0                        |
| PCC 7117        | 275        | 2699            | 148          | 0                        |
| PCC 7502        | 275        | 1060            | 1904         | 6                        |
| PCC 7942        | 275        | 2376            | 4            | 0                        |
| PCC 8807        | 275        | 2643            | 122          | 0                        |
| PCC 7942        | 275        | 2622            | 108          | 1                        |
| PCC 73109       | 275        | 2630            | 93           | 0                        |
| PROS-7-1        | 275        | 2229            | 128          | 0                        |

|           |     |      |     |   |
|-----------|-----|------|-----|---|
| PROS-9-1  | 275 | 1894 | 127 | 0 |
| PROS-U-1  | 275 | 2175 | 187 | 0 |
| RCC307    | 275 | 1997 | 86  | 1 |
| ROS8604   | 275 | 2265 | 276 | 2 |
| RS9902    | 275 | 2126 | 124 | 0 |
| RS9907    | 275 | 2275 | 326 | 1 |
| RS9909    | 275 | 2183 | 125 | 3 |
| RSCCF101  | 275 | 1593 | 753 | 8 |
| SYN20     | 275 | 2135 | 295 | 1 |
| SynAce01  | 275 | 1919 | 443 | 3 |
| TAK9802   | 275 | 1968 | 78  | 0 |
| UTEX 2973 | 275 | 2366 | 7   | 0 |
| UTEX 3055 | 275 | 2276 | 255 | 0 |
| WH 7803   | 275 | 2074 | 73  | 0 |
| WH 8101   | 275 | 2188 | 145 | 1 |
| WH 8109   | 275 | 1882 | 78  | 0 |

**Table S3.** Gene families association with thermal adaptation.

| KO     | Gene name   | Path ID | Pathway                                  |
|--------|-------------|---------|------------------------------------------|
| K00016 | LDH, ldh    | ko00270 | Cysteine and methionine metabolism       |
| K01008 | selD, SEPHS | ko00450 | Selenocompound metabolism                |
| K00137 | prp         | ko00330 | Arginine and proline metabolism          |
| K00276 | AOC2, tynA  | ko00260 | Glycine, serine and threonine metabolism |
| K00549 | metE        | ko00270 | Cysteine and methionine metabolism       |
| K00865 | glxK        | ko00260 | Glycine, serine and threonine metabolism |
| K01243 | mtnN, mtn,  | ko00270 | Cysteine and methionine metabolism       |
| K01473 | hyuA        | ko00330 | Arginine and proline metabolism          |
| K01474 | hyuB        | ko00330 | Arginine and proline metabolism          |
| K01485 | codA        | ko00330 | Arginine and proline metabolism          |
| K04072 | adhE        | ko00350 | Tyrosine metabolism                      |
| K05825 | LYSN        | ko00300 | Lysine biosynthesis                      |
| K12339 | cysM        | ko00270 | Cysteine and methionine metabolism       |
| K00622 | nat         | ko05204 | Human Diseases                           |
| K11594 | DDX3X, bel  | ko05203 | Human Diseases                           |
| K00030 | IDH3        | ko00020 | Citrate cycle (TCA cycle)                |
| K00656 | pflD        | ko00620 | Pyruvate metabolism                      |
| K00852 | rbsK, RBKS  | ko00030 | Pentose phosphate pathway                |
| K00925 | ackA        | ko00620 | Pyruvate metabolism                      |
| K01236 | treZ, glgZ  | ko00500 | Starch and sucrose metabolism            |
| K01512 | acyP        | ko00620 | Pyruvate metabolism                      |
| K01621 | xfp, xpk    | ko00030 | Pentose phosphate pathway                |
| K06044 | treY, glgY  | ko00500 | Starch and sucrose metabolism            |
| K06623 | CDKN2D, P19 | ko04110 | Cell cycle                               |
| K10352 | MYH         | ko04530 | Tight junction                           |
| K00299 | ssuE        | ko00920 | Sulfur metabolism                        |
| K02586 | nifD        | ko00910 | Nitrogen metabolism                      |
| K02588 | nifH        | ko00910 | Nitrogen metabolism                      |
| K02591 | nifK        | ko00910 | Nitrogen metabolism                      |
| K03666 | hfq         | ko03018 | RNA degradation                          |

|        |            |         |                                             |
|--------|------------|---------|---------------------------------------------|
| K09517 | DNAJB11    | ko04141 | Protein processing in endoplasmic reticulum |
| K09540 | SEC63      | ko03060 | Protein export                              |
| K13525 | VCP, CDC48 | ko04141 | Protein processing in endoplasmic reticulum |
| K02843 | waaF, rfaF | ko00540 | Lipopolysaccharide biosynthesis             |
| K14048 | ureAB      | ko05120 | Infectious diseases                         |
| K02006 | cbiO       | ko02010 | ABC transporters                            |
| K02007 | cbiM       | ko02010 | ABC transporters                            |
| K02008 | cbiQ       | ko02010 | ABC transporters                            |
| K02045 | cysA       | ko02010 | ABC transporters                            |
| K02046 | cysU       | ko02010 | ABC transporters                            |
| K02047 | cysW       | ko02010 | ABC transporters                            |
| K02048 | cysP, sbp  | ko02010 | ABC transporters                            |
| K02424 | fliY       | ko02010 | ABC transporters                            |
| K05813 | ugpB       | ko02010 | ABC transporters                            |
| K05814 | ugpA       | ko02010 | ABC transporters                            |
| K05815 | ugpE       | ko02010 | ABC transporters                            |
| K05845 | opuC       | ko02010 | ABC transporters                            |
| K05846 | opuBD      | ko02010 | ABC transporters                            |
| K05847 | opuA       | ko02010 | ABC transporters                            |
| K09811 | ftsX       | ko02010 | ABC transporters                            |
| K09812 | ftsE       | ko02010 | ABC transporters                            |
| K09970 | aapQ, bztB | ko02010 | ABC transporters                            |
| K09971 | aapM, bztC | ko02010 | ABC transporters                            |
| K10009 | ABC.CYST.P | ko02010 | ABC transporters                            |
| K11069 | potD       | ko02010 | ABC transporters                            |
| K11070 | potC       | ko02010 | ABC transporters                            |
| K11071 | potB       | ko02010 | ABC transporters                            |
| K11072 | potA       | ko02010 | ABC transporters                            |
| K11707 | troA, mntA | ko02010 | ABC transporters                            |
| K11710 | troB, mntB | ko02010 | ABC transporters                            |
| K11951 | cmpB       | ko02010 | ABC transporters                            |
| K11952 | cmpC       | ko02010 | ABC transporters                            |
| K13892 | gsiA       | ko02010 | ABC transporters                            |
| K15576 | nrtA, cynA | ko02010 | ABC transporters                            |
| K16201 | dppC1      | ko02010 | ABC transporters                            |
| K16915 | cbiL       | ko02010 | ABC transporters                            |
| K00077 | panE, apbA | ko00770 | Metabolism of cofactors and vitamins        |
| K00231 | PPOX, hemY | ko00860 | Metabolism of cofactors and vitamins        |
| K01239 | iunH       | ko00760 | Metabolism of cofactors and vitamins        |
| K03153 | thiO       | ko00730 | Metabolism of cofactors and vitamins        |
| K03707 | tenA       | ko00730 | Metabolism of cofactors and vitamins        |
| K05895 | cobK-cbiJ  | ko00860 | Metabolism of cofactors and vitamins        |
| K18278 | THI5       | ko00730 | Metabolism of cofactors and vitamins        |
| K10396 | KIF5       | ko04728 | Dopaminergic synapse                        |
| K00087 | ygeS, xdhA | ko00230 | Purine metabolism                           |
| K01518 | NUDT2      | ko00230 | Purine metabolism                           |
| K03652 | MPG        | ko03410 | Base excision repair                        |
| K00425 | cydA       | ko02020 | Two-component system                        |
| K00426 | cydB       | ko02020 | Two-component system                        |
| K01077 | phoA, phoB | ko02020 | Two-component system                        |
| K07670 | mtrA       | ko02020 | Two-component system                        |

|        |            |         |                                       |
|--------|------------|---------|---------------------------------------|
| K11328 | nrsS, rppB | ko02020 | Two-component system                  |
| K11525 | pixJ       | ko02020 | Two-component system                  |
| K18649 | IMPL2      | ko04070 | Phosphatidylinositol signaling system |

**Table S4.** Gene families association with cold adaptation.

| KO     | Gene name  | Path ID | Pathway                                     |
|--------|------------|---------|---------------------------------------------|
| K00042 | garR, glxR | ko00630 | Valine, leucine and isoleucine degradation  |
| K00067 | rfbD, rmlD | ko00521 | Alanine, aspartate and glutamate metabolism |
| K00128 | E1.2.1.3   | ko00280 | Histidine metabolism                        |
| K00383 | GSR, gor   | ko00480 | Histidine metabolism                        |
| K00678 | LRAT       | ko00830 | Histidine metabolism                        |
| K10238 | thuG, sugB | ko02010 | Glutathione metabolism                      |
| K11927 | rhIE       | ko03018 | Taurine and hypotaurine metabolism          |
| K00833 | bioA       | ko00780 | Streptomycin biosynthesis                   |
| K00864 | glpK, GK   | ko00561 | Streptomycin biosynthesis                   |
| K00973 | rfbA, rffH | ko00521 | Streptomycin biosynthesis                   |
| K01437 | ASPA, aspA | ko00250 | Streptomycin biosynthesis                   |
| K01594 | CSAD       | ko00430 | Glyoxylate and dicarboxylate metabolism     |
| K01623 | ALDO       | ko00010 | Glycolysis / Gluconeogenesis                |
| K01663 | HIS7       | ko00340 | Starch and sucrose metabolism               |
| K01679 | fumC       | ko05200 | Amino sugar and nucleotide sugar metabolism |
| K01710 | rfbB, rffG | ko00521 | Starch and sucrose metabolism               |
| K01790 | rfbC, rmlC | ko00521 | Protein processing in endoplasmic reticulum |
| K02438 | treX, glgX | ko00500 | RNA degradation                             |
| K02564 | nagB       | ko00520 | Cancers                                     |
| K03465 | thyX, thy1 | ko00670 | Drug resistance                             |
| K06443 | lcyB, crtY | ko00906 | Drug resistance                             |
| K07190 | PHKA       | ko04020 | Glycerolipid metabolism                     |
| K07264 | arnT, pmrK | ko01503 | ABC transporters                            |
| K07659 | ompR       | ko02020 | ABC transporters                            |
| K08218 | ampG       | ko01501 | ABC transporters                            |
| K08679 | E5.1.3.6   | ko00500 | Metabolism of cofactors and vitamins        |
| K09523 | DNAJC3     | ko04141 | Metabolism of cofactors and vitamins        |
| K10237 | thuF, sugA | ko02010 | Metabolism of cofactors and vitamins        |
| K13342 | PEX5, PXR1 | ko04146 | Metabolism of terpenoids and polyketides    |
| K18104 | abcA, bmrA | ko02010 | Calcium signaling pathway                   |
| K18911 | egtD       | ko00340 | Two-component system                        |
| K18912 | egtB       | ko00340 | Peroxisome                                  |

**Table S5.** Gene families association with halotolerance.

| KO     | Gene name       | Path ID | Pathway                                    |
|--------|-----------------|---------|--------------------------------------------|
| K00020 | mmsB            | ko00280 | Valine, leucine and isoleucine degradation |
| K00031 | IDH1, IDH2, icd | ko04146 | Valine, leucine and isoleucine degradation |
| K00042 | garR, glxR      | ko00630 | Valine, leucine and isoleucine degradation |
| K00067 | rfbD, rmlD      | ko00521 | Arginine and proline metabolism            |
| K00111 | glpA, glpD      | ko00564 | Glycine, serine and threonine metabolism   |
| K00128 | E1.2.1.3        | ko00280 | Cysteine and methionine metabolism         |
| K00263 | E1.4.1.9        | ko00280 | Cysteine and methionine metabolism         |
| K00286 | proC            | ko00330 | Arginine and proline metabolism            |
| K00390 | cysH            | ko00920 | Arginine and proline metabolism            |

|        |                  |         |                                                       |
|--------|------------------|---------|-------------------------------------------------------|
| K00432 | E1.11.1.9        | ko00590 | Arginine and proline metabolism                       |
| K00517 | E1.14.-.-        | ko00945 | Cysteine and methionine metabolism                    |
| K00605 | gcvT, AMT        | ko00260 | Histidine metabolism                                  |
| K00651 | metA             | ko00270 | Valine, leucine and isoleucine biosynthesis           |
| K00652 | bioF             | ko00780 | Cysteine and methionine metabolism                    |
| K00678 | LRAT             | ko00830 | Glycine, serine and threonine metabolism              |
| K00681 | ggt              | ko00430 | Glycine, serine and threonine metabolism              |
| K00690 | E2.4.1.7         | ko00500 | Phenylalanine, tyrosine and tryptophan biosynthesis   |
| K00748 | lpxB             | ko00540 | Histidine metabolism                                  |
| K00759 | APRT, apt        | ko00230 | Cysteine and methionine metabolism                    |
| K00784 | rnz              | ko03013 | Cysteine and methionine metabolism                    |
| K00791 | miaA, TRIT1      | ko00908 | Histidine metabolism                                  |
| K07462 | recJ             | ko03410 | Taurine and hypotaurine metabolism                    |
| K08289 | purT             | ko00670 | Selenocompound metabolism                             |
| K08303 | K08303           | ko05120 | Taurine and hypotaurine metabolism                    |
| K00793 | ribE, RIB5       | ko00740 | Streptomycin biosynthesis                             |
| K00797 | speE, SRM        | ko00270 | Stilbenoid, diarylheptanoid and gingerol biosynthesis |
| K00830 | AGXT             | ko04146 | Glyoxylate and dicarboxylate metabolism               |
| K00847 | scrK             | ko00051 | Starch and sucrose metabolism                         |
| K00859 | coaE             | ko00770 | Fructose and mannose metabolism                       |
| K00860 | cysC             | ko00920 | Fructose and mannose metabolism                       |
| K00864 | glpK, GK         | ko00561 | Pyruvate metabolism                                   |
| K00919 | ispE             | ko00900 | Pyruvate metabolism                                   |
| K00939 | adk, AK          | ko00230 | Starch and sucrose metabolism                         |
| K00943 | tmk, DTYMK       | ko00240 | Amino sugar and nucleotide sugar metabolism           |
| K00946 | thiL             | ko00730 | Starch and sucrose metabolism                         |
| K00950 | folK             | ko00790 | Amino sugar and nucleotide sugar metabolism           |
| 00969  | nadD             | ko00760 | Fructose and mannose metabolism                       |
| K00971 | manC, cpsB       | ko00051 | Starch and sucrose metabolism                         |
| K00974 | cca              | ko03013 | Glyoxylate and dicarboxylate metabolism               |
| K01008 | selD, SEPHS      | ko00450 | Cell growth and death                                 |
| K01012 | bioB             | ko00780 | Drug resistance                                       |
| K01046 | E3.1.1.3         | ko00561 | Drug resistance                                       |
| K01082 | cysQ, BPNT1      | ko00920 | Drug resistance                                       |
| K01191 | E3.2.1.24        | ko00511 | Drug resistance                                       |
| K01448 | amiA, amiB, amiC | ko01503 | Sulfur metabolism                                     |
| K01470 | E3.5.2.10        | ko00330 | Sulfur metabolism                                     |
| K01480 | speB             | ko00330 | Sulfur metabolism                                     |
| K01485 | codA             | ko00330 | Nitrogen metabolism                                   |
| K01512 | acyP             | ko00620 | Photosynthesis - antenna proteins                     |
| K01589 | purK             | ko00230 | Oxidative phosphorylation                             |
| K01591 | pyrF             | ko00240 | Photosynthesis - antenna proteins                     |
| K01594 | CSAD             | ko00430 | Nitrogen metabolism                                   |
| K01611 | speD, AMD1       | ko00270 | Photosynthesis                                        |
| K01627 | kdsA             | ko00540 | Photosynthesis                                        |
| K01663 | HIS7             | ko00340 | Photosynthesis                                        |
| K01665 | pabB             | ko00790 | Photosynthesis                                        |
| K01687 | ilvD             | ko00290 | Photosynthesis                                        |
| K01725 | cynS             | ko00910 | Photosynthesis                                        |
| K01739 | metB             | ko00270 | Oxidative phosphorylation                             |
| K01754 | ilvA, tdcB       | ko00260 | Environmental adaptation                              |

|        |                  |         |                                             |
|--------|------------------|---------|---------------------------------------------|
| K01758 | CTH              | ko00260 | Sulfur relay system                         |
| K01759 | GLO1, gloA       | ko04011 | Sulfur relay system                         |
| K01817 | trpF             | ko00400 | Sulfur relay system                         |
| K01897 | ACSL, fadD       | ko04146 | Sulfur relay system                         |
| K01935 | bioD             | ko00780 | RNA degradation                             |
| K02038 | pstA             | ko02010 | RNA degradation                             |
| K02041 | phnC             | ko02010 | Folding, sorting and degradation            |
| K02092 | apcA             | ko00196 | RNA degradation                             |
| K02160 | accB, bccP       | ko00620 | Protein processing in endoplasmic reticulum |
| K02188 | cbiD             | ko00860 | Lipopolysaccharide biosynthesis             |
| K02224 | cobB-cbiA        | ko00860 | Other glycan degradation                    |
| K02259 | COX15            | ko02020 | Lipopolysaccharide biosynthesis             |
| K02275 | coxB             | ko00190 | Lipopolysaccharide biosynthesis             |
| K02290 | cpcG             | ko00196 | Lipopolysaccharide biosynthesis             |
| K02438 | treX, glgX       | ko00500 | Peptidoglycan biosynthesis                  |
| K02471 | yddA             | ko02010 | Peptidoglycan biosynthesis                  |
| K02502 | hisZ             | ko00340 | Infectious diseases                         |
| K02536 | lpxD             | ko00540 | Glycerophospholipid metabolism              |
| K02548 | menA             | ko00130 | Arachidonic acid metabolism                 |
| K02549 | menC             | ko00130 | Glycerolipid metabolism                     |
| K02552 | menF             | ko00130 | Glycerolipid metabolism                     |
| K02564 | nagB, GNPDA      | ko00520 | Glycerolipid metabolism                     |
| K02575 | narK, nrtP, nasA | ko00910 | Glycerolipid metabolism                     |
| K02638 | petE             | ko00195 | ABC transporters                            |
| K02698 | psaK             | ko00195 | ABC transporters                            |
| K02699 | psaL             | ko00195 | ABC transporters                            |
| K02717 | psbP             | ko00195 | Phosphotransferase system (PTS)             |
| K02719 | psbU             | ko00195 | ABC transporters                            |
| K02722 | psbX             | ko00195 | ABC transporters                            |
| K02757 | bglF             | ko02060 | ABC transporters                            |
| K02891 | RP-L22e, RPL22   | ko03010 | ABC transporters                            |
| K03046 | rpoC             | ko03020 | ABC transporters                            |
| K03060 | rpoZ             | ko03020 | ABC transporters                            |
| K03113 | EIF1, SUI1       | ko03013 | ABC transporters                            |
| K03270 | kdsC             | ko00540 | ABC transporters                            |
| K03394 | cobI-cbiL        | ko00860 | ABC transporters                            |
| K03465 | thyX, thy1       | ko00670 | ABC transporters                            |
| K03469 | rnhA, RNASEH1    | ko03030 | ABC transporters                            |
| K03470 | rnhB             | ko03030 | ABC transporters                            |
| K03523 | bioY             | ko02010 | Biotin metabolism                           |
| K03584 | recO             | ko03440 | Retinol metabolism                          |
| K03587 | ftsI             | ko01501 | Riboflavin metabolism                       |
| K03588 | ftsW, spoVE      | ko04112 | Pantothenate and CoA biosynthesis           |
| K03601 | xseA             | ko03430 | Thiamine metabolism                         |
| K03635 | MOCS2, moaE      | ko04122 | Folate biosynthesis                         |
| K03636 | moaD             | ko04122 | Nicotinate and nicotinamide metabolism      |
| K03637 | moaC             | ko04122 | Biotin metabolism                           |
| K03639 | MOCS1, moaA      | ko04122 | Folate biosynthesis                         |
| K03654 | recQ             | ko03018 | Biotin metabolism                           |
| K03795 | cbiX             | ko00860 | Porphyrin and chlorophyll metabolism        |
| K04565 | SOD1             | ko04146 | Porphyrin and chlorophyll metabolism        |

|        |                  |         |                                                     |
|--------|------------------|---------|-----------------------------------------------------|
| K05275 | E1.1.1.65        | ko00750 | Ubiquinone and other terpenoid-quinone biosynthesis |
| K05343 | treS             | ko00500 | Ubiquinone and other terpenoid-quinone biosynthesis |
| K05366 | mrcA             | ko01501 | Ubiquinone and other terpenoid-quinone biosynthesis |
| K05585 | ndhN             | ko00190 | Porphyrin and chlorophyll metabolism                |
| K05592 | deaD, cshA       | ko03018 | One carbon pool by folate                           |
| K06118 | SQD1, sqdB       | ko00520 | Porphyrin and chlorophyll metabolism                |
| K06153 | bacA             | ko00550 | Vitamin B6 metabolism                               |
| K06444 | lcyE, crtL2      | ko00906 | Folate biosynthesis                                 |
| K06920 | queC             | ko00790 | Metabolism of cofactors and vitamins                |
| K07026 | E3.1.3.70        | ko00051 | Metabolism of cofactors and vitamins                |
| K07190 | PHKA             | ko04020 | Metabolism of cofactors and vitamins                |
| K07259 | dacB             | ko00550 | Metabolism of cofactors and vitamins                |
| K07260 | vanY             | ko02020 | Ubiquinone and other terpenoid-quinone biosynthesis |
| K08479 | sasA             | ko02020 | Zeatin biosynthesis                                 |
| K08591 | plsY             | ko00561 | Terpenoid backbone biosynthesis                     |
| K08679 | E5.1.3.6         | ko00500 | Carotenoid biosynthesis                             |
| K08964 | mtnB             | ko00270 | Carotenoid biosynthesis                             |
| K08967 | mtnD, mtnZ, ADI1 | ko00270 | Purine metabolism                                   |
| K09457 | queF             | ko00790 | Purine metabolism                                   |
| K09503 | DNAJA2           | ko04141 | Pyrimidine metabolism                               |
| K09835 | crtISO, crtH     | ko00906 | Purine metabolism                                   |
| K09970 | aapQ, bztB       | ko02010 | Pyrimidine metabolism                               |
| K09971 | aapM, bztC       | ko02010 | DNA replication                                     |
| K10111 | malK, mtlK, thuK | ko02010 | DNA replication                                     |
| K10236 | thuE             | ko02010 | Homologous recombination                            |
| K10237 | thuF, sugA       | ko02010 | Mismatch repair                                     |
| K10238 | thuG, sugB       | ko02010 | Base excision repair                                |
| K10747 | LIG1             | ko03030 | DNA replication                                     |
| K11472 | glcE             | ko00630 | MAPK signaling pathway - yeast                      |
| K11601 | mntC             | ko02010 | Two-component system                                |
| K11602 | mntB             | ko02010 | Calcium signaling pathway                           |
| K11603 | mntA             | ko02010 | Two-component system                                |
| K11705 | mtsB             | ko02010 | Two-component system                                |
| K11720 | lptG             | ko02010 | RNA polymerase                                      |
| K11754 | folC             | ko00790 | RNA polymerase                                      |
| K12119 | CRY2             | ko04712 | RNA transport                                       |
| K12573 | rnR, vacB        | ko03018 | RNA transport                                       |
| K13541 | cbiGH-cobJ       | ko00860 | Ribosome                                            |
| K13993 | HSP20            | ko04141 | RNA transport                                       |
| K17836 | penP             | ko01501 | Peroxisome                                          |
| K18534 | K18534           | ko00130 | Peroxisome                                          |
| K18912 | egtB             | ko00340 | Peroxisome                                          |
| K19003 | mgdA             | ko00561 | Peroxisome                                          |

Table S6. Gene families association with freshwater adaptation.

| KO     | Gene name   | Path ID | Pathway                             |
|--------|-------------|---------|-------------------------------------|
| K00027 | sfcA, maeA  | ko02020 | TPeroxisome                         |
| K00134 | GAPDH, gapA | ko04066 | Transport and catabolism Peroxisome |
| K00259 | ald         | ko00250 | Two-component system                |
| K00425 | cydA        | ko02020 | HIF-1 signaling pathway             |

|        |                  |         |                                             |
|--------|------------------|---------|---------------------------------------------|
| K00426 | cydB             | ko02020 | Two-component system                        |
| K00441 | frhB             | ko00680 | Two-component system                        |
| K00641 | metX             | ko00270 | Two-component system                        |
| K00764 | purF, PPAT       | ko00250 | Two-component system                        |
| K00835 | avtA             | ko00290 | Two-component system                        |
| K00941 | thiD             | ko00730 | ABC transporters                            |
| K01011 | tst, mpst, sseA  | ko04122 | ABC transporters                            |
| K01061 | E3.1.1.45        | ko00361 | ABC transporters                            |
| K01546 | kdpA             | ko02020 | ABC transporters                            |
| K01547 | kdpB             | ko02020 | ABC transporters                            |
| K01548 | kdpC             | ko02020 | ABC transporters                            |
| K01569 | oxdD             | ko00630 | ABC transporters                            |
| K01621 | xfp, xpk         | ko00030 | ABC transporters                            |
| K01673 | cynT, can        | ko00910 | ABC transporters                            |
| K01711 | gmd, GMDS        | ko00051 | ABC transporters                            |
| K01770 | ispF             | ko00900 | Two-component system                        |
| K01809 | manA, MPI        | ko00051 | AMPK signaling pathway                      |
| K01823 | idi, IDI         | ko00900 | Two-component system                        |
| K01893 | NARS, asnS       | ko00970 | Two-component system                        |
| K01995 | livG             | ko02010 | Two-component system                        |
| K01996 | livF             | ko02010 | Two-component system                        |
| K01997 | livH             | ko02010 | Two-component system                        |
| K01998 | livM             | ko02010 | Two-component system                        |
| K02012 | afuA, fbpA       | ko02010 | Two-component system                        |
| K02040 | pstS             | ko02010 | ABC transporters                            |
| K02045 | cysA             | ko02010 | ABC transporters                            |
| K02046 | cysU             | ko02010 | ABC transporters                            |
| K02047 | cysW             | ko02010 | ABC transporters                            |
| K02048 | cysP, sbp        | ko02010 | ABC transporters                            |
| K02191 | cbiT             | ko00860 | ABC transporters                            |
| K02495 | hemN, hemZ       | ko00860 | ABC transporters                            |
| K02501 | hisH             | ko00340 | ABC transporters                            |
| K02658 | pilH             | ko02020 | Sulfur relay system                         |
| K03272 | gmhC, hldE,      | ko00540 | Aminoacyl-tRNA biosynthesis                 |
| K03462 | NAMPT            | ko00760 | Replication and repair                      |
| K03550 | ruvA             | ko03440 | Alanine, aspartate and glutamate metabolism |
| K03778 | ldhA             | ko00620 | Methane metabolism                          |
| K03781 | katE, CAT, catB, | ko04146 | Cysteine and methionine metabolism          |
| K03841 | fbp              | ko04152 | Alanine, aspartate and glutamate metabolism |
| K04564 | SOD2             | ko04146 | Valine, leucine and isoleucine biosynthesis |
| K07646 | kdpD             | ko02020 | Thiamine metabolism                         |
| K07657 | phoB             | ko02020 | Xenobiotics biodegradation and metabolism   |
| K08641 | vanX             | ko02020 | Glyoxylate and dicarboxylate metabolism     |
| K11520 | manS             | ko02020 | Pentose phosphate pathway                   |
| K11521 | K11521, manR     | ko02020 | Nitrogen metabolism                         |
| K11522 | pixG             | ko02020 | Fructose and mannose metabolism             |
| K11526 | pixL             | ko02020 | Terpenoid backbone biosynthesis             |
| K11780 | cofG             | ko00680 | Fructose and mannose metabolism             |
| K11781 | cofH             | ko00680 | Terpenoid backbone biosynthesis             |
| K11950 | cmpA             | ko02010 | Porphyrin and chlorophyll metabolism        |
| K11951 | cmpB             | ko02010 | Porphyrin and chlorophyll metabolism        |

---

|        |              |         |                                             |
|--------|--------------|---------|---------------------------------------------|
| K11952 | cmpC         | ko02010 | Histidine metabolism                        |
| K11956 | natD         | ko02010 | Lipopolysaccharide biosynthesis             |
| K11957 | natA         | ko02010 | Nicotinate and nicotinamide metabolism      |
| K11958 | natE         | ko02010 | Pyruvate metabolism                         |
| K13066 | COMT         | ko00940 | Methane metabolism                          |
| K13522 | K13522, nadM | ko00760 | Methane metabolism                          |
| K13540 | cobIJ        | ko00860 | Biosynthesis of other secondary metabolites |
| K13896 | yejF         | ko02010 | Metabolism of cofactors and vitamins        |
| K15578 | nrtC, nasD   | ko02010 | Metabolism of cofactors and vitamins        |
| K16881 | K16881       | ko00051 | Fructose and mannose metabolism             |

---
